# Supplementary material for: Further Evaluation of the Base Stability of Hydrophilic Interaction Chromatography Columns Packed with Silica or Ethylene-Bridged Hybrid Particles
Source: MDPI journal article supplement (doi:10.3390/separations10030175), 2023-03-06
Supplement: s1 [file s1]

Archive with 1 entries (1 files):
- separations-2240043-supplementary.pdf
