# Supplementary material for: Further Evaluation of the Base Stability of Hydrophilic Interaction Chromatography Columns Packed with Silica or Ethylene-Bridged Hybrid Particles
Source: MDPI journal article supplement (doi:10.3390/separations10030175), 2023-03-06
Supplement: s1 [file s1 › separations-2240043-supplementary.pdf]

Supporting Information for

# **Further Evaluation of the Base Stability of Hydrophilic Interaction Chromatography Columns Packed with Silica or Ethylene-Bridged Hybrid Particles**

Thomas H. Walter\*, Cheryl Boissel, Jessica A. Field and Nicole L. Lawrence

Waters Corporation, 34 Maple Street, Milford, MA

\*Corresponding Author

Tel.: (508) 498-9633. Email: tom\_walter@waters.com.

## **Table of Contents**

Page S2 - Figure S1: Comparison of relative changes in average tailing factor and efficiency for a BEH130 HILIC Column exposed to 100% aqueous pH 11.30 10 mM AmBic at 70°C

Page S3 - Figure S2: Relative changes in retention factors for BEH130 HILIC Columns exposed at 70°C to basic challenge solutions with different water concentrations

Page S4 - Figure S3: Relative changes in retention factors for columns packed with BEH materials of different surface area exposed at 70°C to 100% aqueous pH 11.30 10 mM AmBic

Page S5 - Figure S4: Relative changes in retention factors for columns packed with BEH Sulfobetaine materials of different surface area exposed at 70°C to 100% aqueous pH 11.30 10 mM AmBic

Page S6 - Figure S5: Relative changes in retention factors for three commercially available HILIC columns exposed at 70°C to 100% aqueous pH 11.30 10 mM AmBic

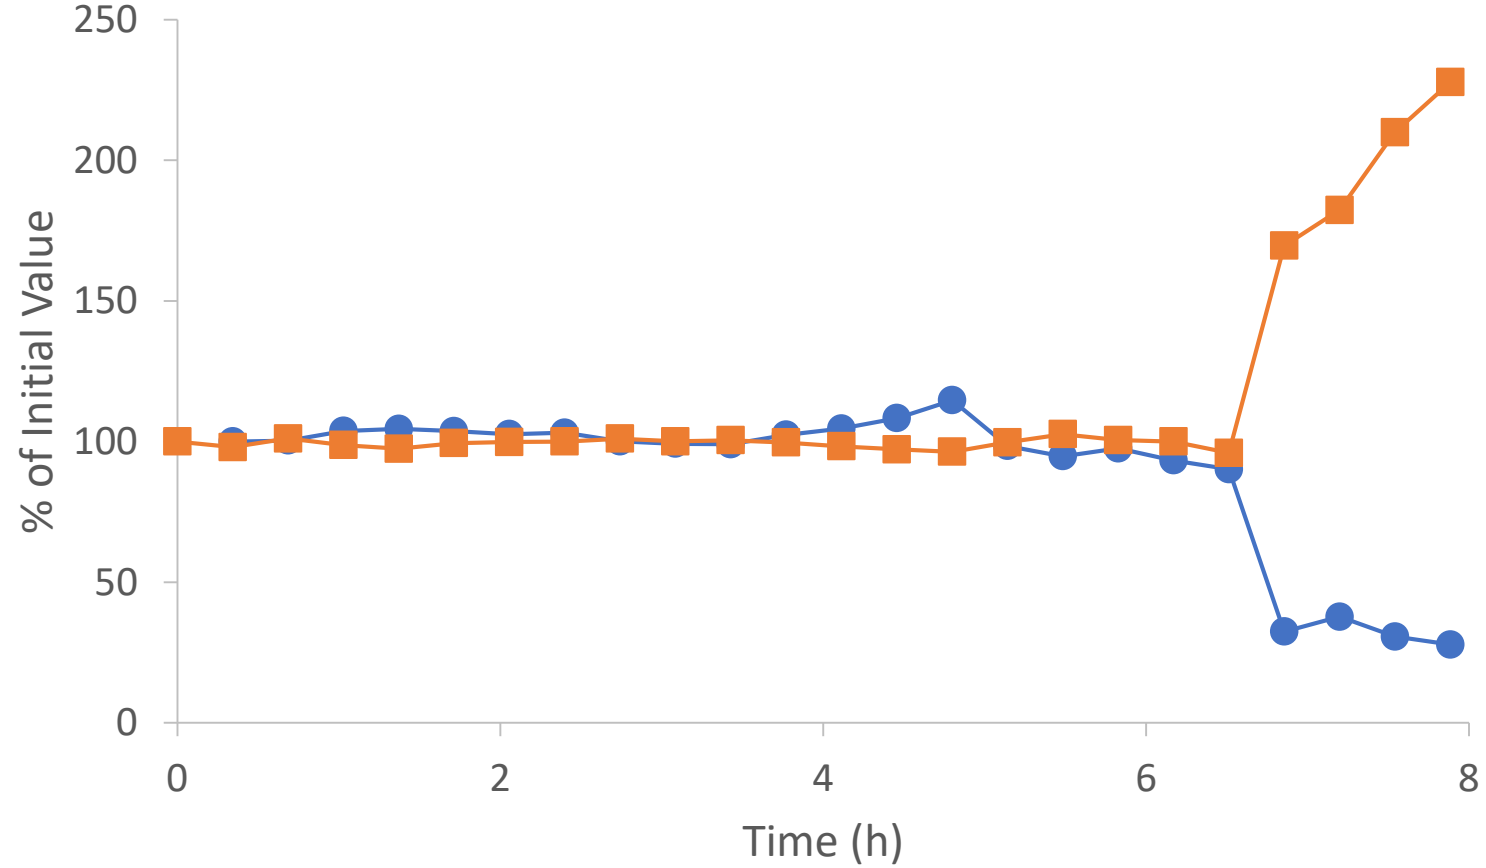

Figure S1: Comparison of the % of the initial average tailing factor and efficiency for a 2.1 x 50 mm 1.7  $\mu$ m BEH130 HILIC Column vs time exposed to 100% pH 11.30 10 mM ammonium bicarbonate (AmBic) at 70°C (blue circles, efficiency; orange squares, tailing factor).

A

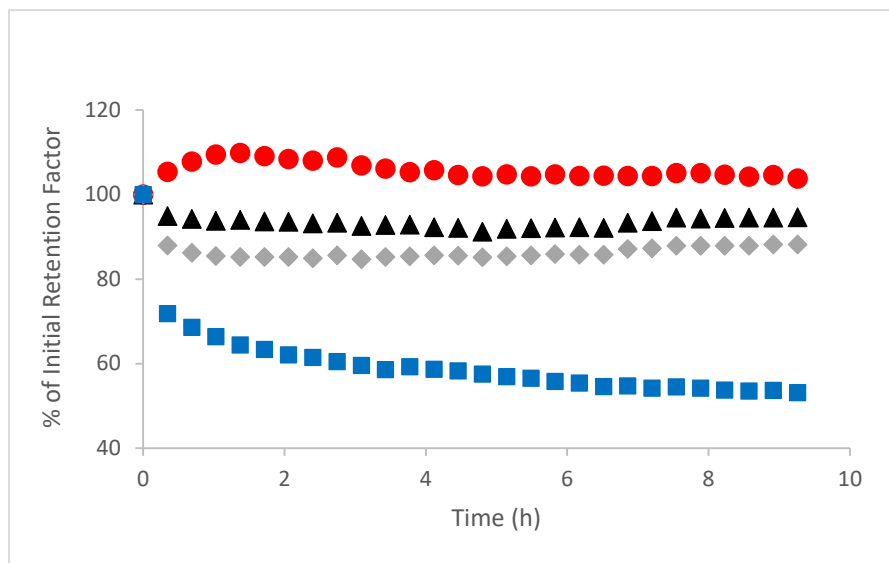

C

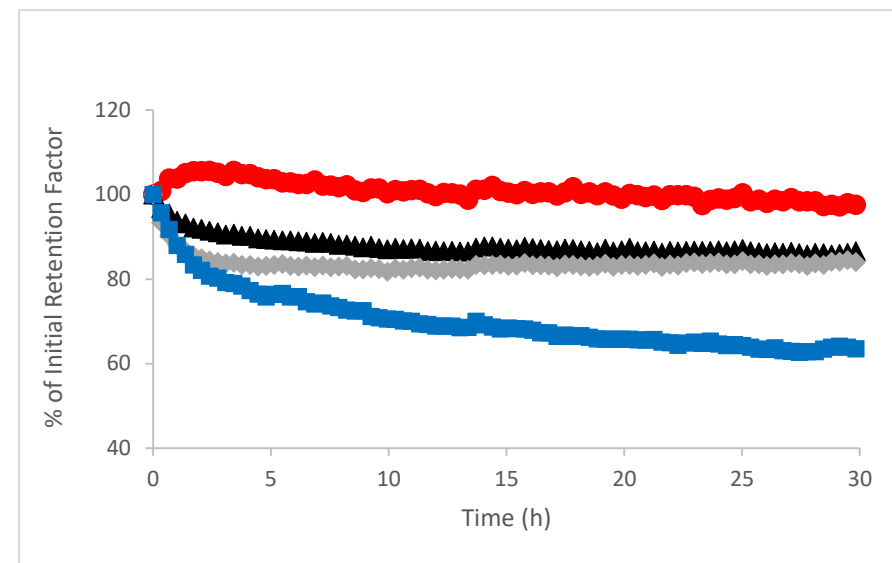

B

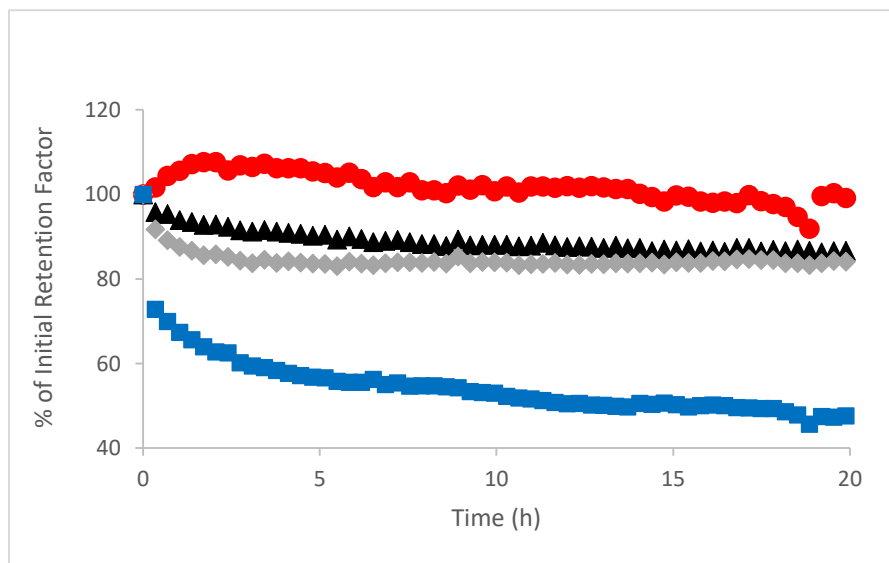

Figure S2: Relative changes in retention factors during base stability tests of 2.1 x 50 mm 1.7  $\mu$ m BEH130 HILIC Columns, shown as % of initial retention factor vs time exposed to the basic solution (blue squares – TMPA, black triangles – cytosine, gray diamonds – adenine, red circles – TS). The columns were exposed at 70°C to solutions containing (A) 100% pH 11.30 10 mM AmBic, (B) 10/90 v/v acetonitrile/w<sub>p</sub>H 11.30 10 mM AmBic, (C) 20/80 acetonitrile/w<sub>p</sub>H 11.30 10 mM AmBic.

A

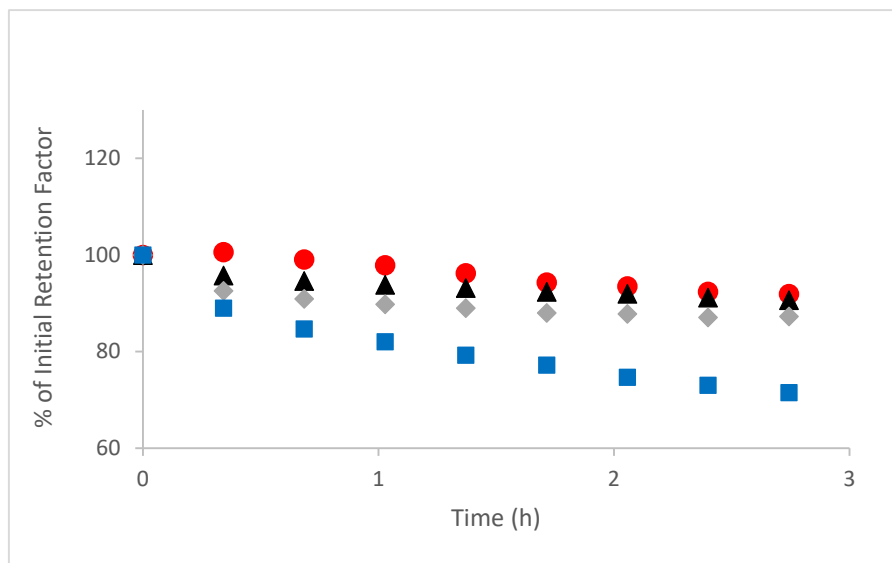

C

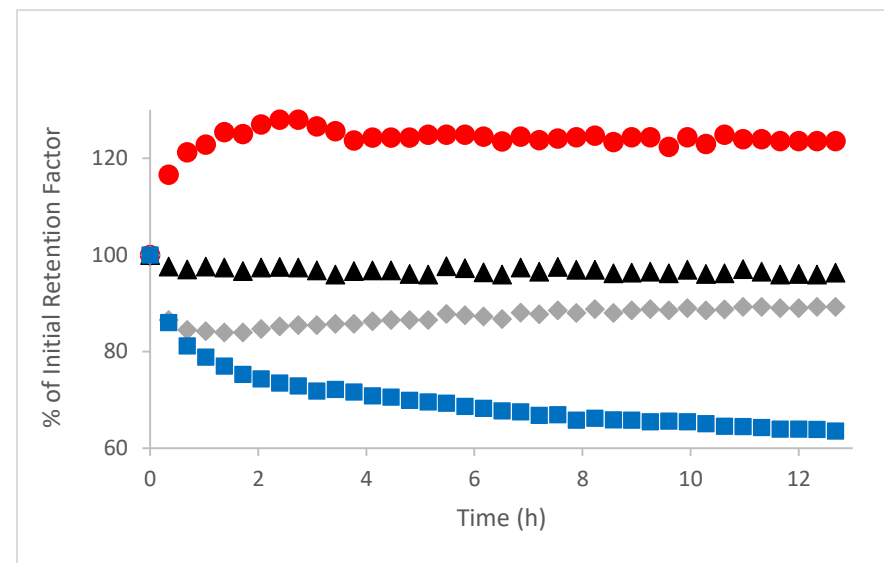

B

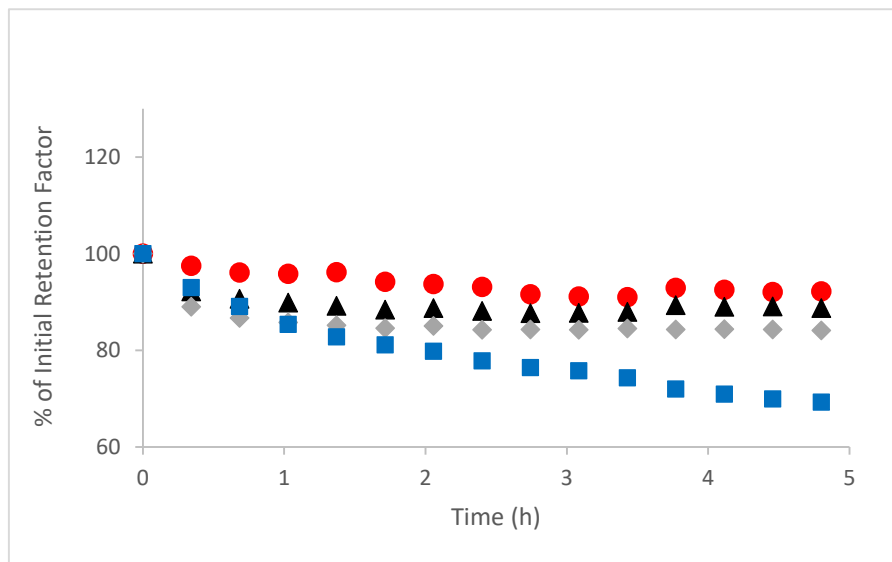

Figure S3: Relative changes in retention factors during base stability tests of 2.1 x 50 mm columns packed with 1.7  $\mu\text{m}$  unbonded BEH materials of varying surface area, shown as % of initial retention factor vs time exposed to the basic solution (blue squares – TMPA, black triangles – cytosine, gray diamonds – adenine, red circles – TS). The columns were exposed at 70°C to a solution containing 100% pH 11.30 10 mM AmBic: (A) BEH65 (399  $\text{m}^2/\text{g}$ ), (B) BEH95 (273  $\text{m}^2/\text{g}$ ), (C) BEH300 (92  $\text{m}^2/\text{g}$ ).

A

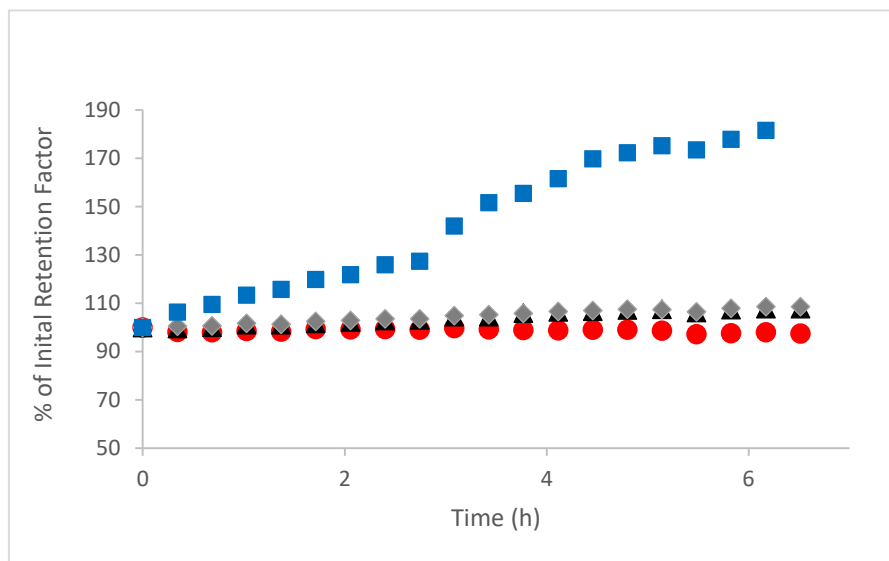

B

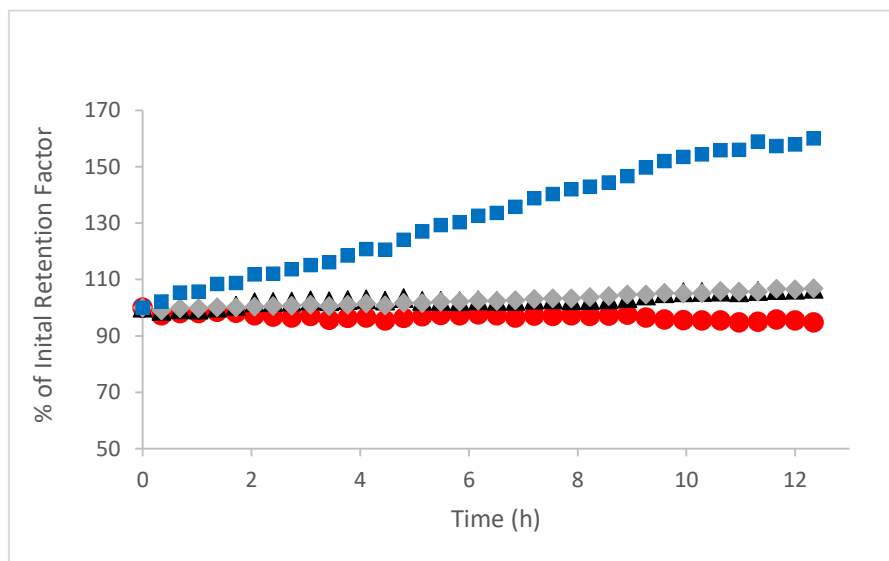

Figure S4: Relative changes in retention factors during base stability tests of 2.1 x 50 mm columns packed with 1.7  $\mu\text{m}$  BEH Sulfobetaine materials of varying surface area, shown as % of initial retention factor vs time exposed to the basic solution (blue squares – TMPA, black triangles – cytosine, gray diamonds – adenine, red circles – TS). The columns were exposed at 70°C to a solution containing 100% pH 11.30 10 mM AmBic: (A) BEH95 S (172  $\text{m}^2/\text{g}$ ), (B) BEH130 S (133  $\text{m}^2/\text{g}$ )

A

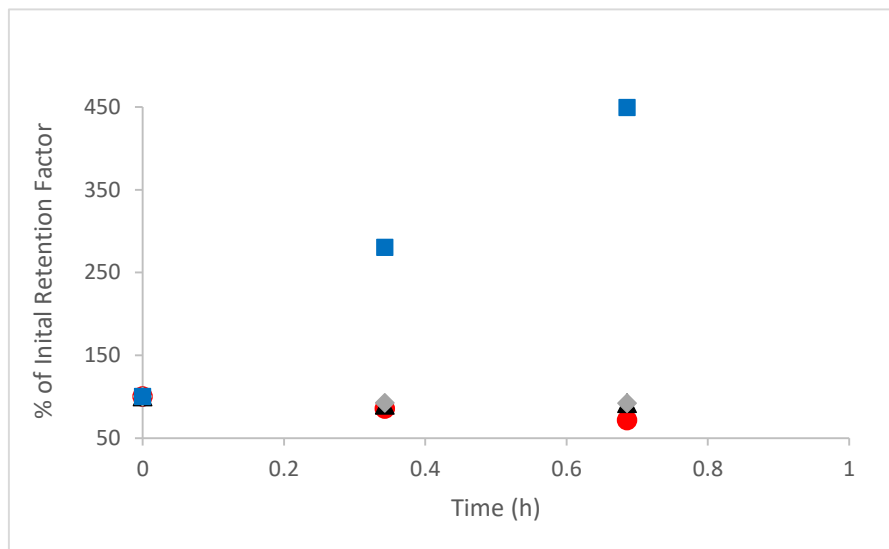

C

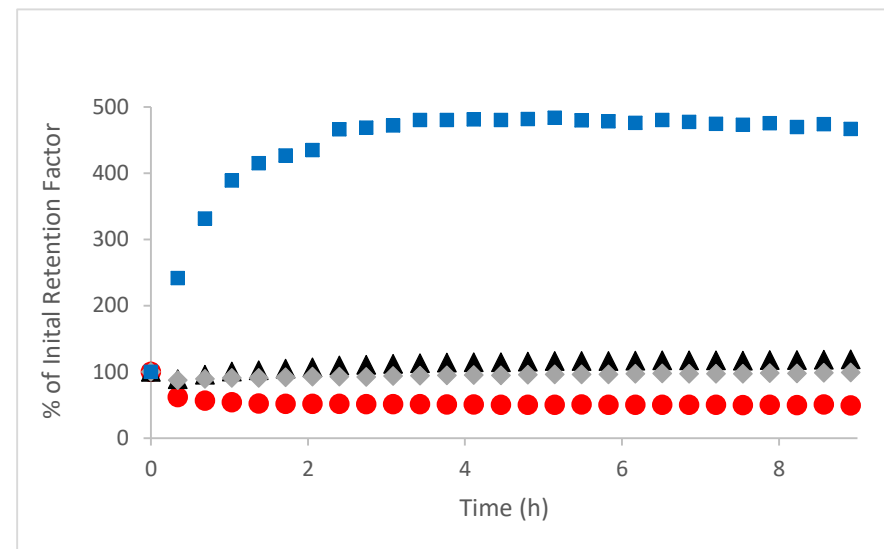

B

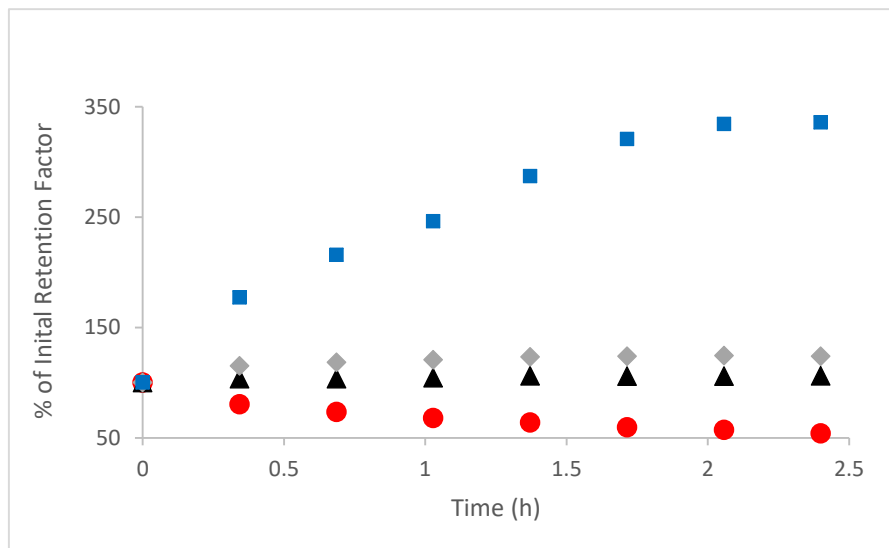

Figure S5: Relative changes in retention factors during base stability tests of several HILIC columns, shown as % of initial retention factor vs time exposed to the basic solution (blue squares – TMPA, black triangles – cytosine, gray diamonds - adenine, red circles - TS). The columns were exposed at 70°C to a solution containing 100% pH 11.30 10 mM AmBic: (A) Luna NH2 Column, (B) Poroshell 120 HILIC-Z Column, (C) Torus Diol Column.
